# Supplementary material for: Microbial Diversity and Enzyme Activity as Indicators of Permethrin-Exposed Soil Health
Source: MDPI journal article supplement (doi:10.3390/molecules28124756), 2023-06-14
Supplement: s1 [file s1]

# Microbial Diversity and Enzyme Activity as Indicators of Permethrin-Exposed Soil Health

Agata Borowik, Jadwiga Wyszowska \*, Magdalena Zaborowska and Jan Kucharski

Department of Soil Science and Microbiology, Faculty of Agriculture and Forestry, University of Warmia and Mazury in Olsztyn, 10-719 Olsztyn, Poland; agata.borowik@uwm.edu.pl (A.B.); m.zaborowska@uwm.edu.pl (M.Z.); jan.kucharski@uwm.edu.pl (J.K.)

\* Correspondence: jadwiga.wyszowska@uwm.edu.pl

**Table S1.** Properties of soil.

| Parameter                              | Content / Unit *                                                                                                  |
|----------------------------------------|-------------------------------------------------------------------------------------------------------------------|
| Sandy loam                             | clay - 1.69 % fraction <0.002 mm<br>silt - 20.13% fraction 0.002-0.05 mm<br>sand - 78.18% fraction 0.05 mm-2.0 mm |
| pH <sub>KCl</sub>                      | 6.3                                                                                                               |
| hydrolytic acidity (HAC)               | 1.16 cmol(+)g kg <sup>-1</sup>                                                                                    |
| sum of exchangeable base cations (EBC) | 5.82 cmol(+)g kg <sup>-1</sup>                                                                                    |
| cation exchange capacity (CEC)         | 6.98 cmol(+)g kg <sup>-1</sup>                                                                                    |
| alkaline cation saturation (ACS)       | 83.4%                                                                                                             |
| C <sub>org</sub>                       | 7.5 g kg <sup>-1</sup>                                                                                            |
| N <sub>tot</sub>                       | 0.64 g kg <sup>-1</sup>                                                                                           |
| P <sub>available</sub>                 | 98 mg kg <sup>-1</sup>                                                                                            |
| K <sub>available</sub>                 | 133 mg kg <sup>-1</sup>                                                                                           |
| Mg <sub>available</sub>                | 42 mg kg <sup>-1</sup>                                                                                            |

\* all soil properties are given in dry weight (d.m.) of soil.
